# Supplementary material for: Effects of Anti-TNF and NSAID Therapy on Choroidal and Macular Thickness in Ankylosing Spondylitis: An OCT-Based Evaluation of Subclinical Inflammation
Source: Research Square preprint supplement (doi:10.21203/rs.3.rs-8234375/v1), 2025-12-11
Supplement: Supplementary file 1 [file 06776170c11c81d6435c5664.docx]

**Table 1. Demographic and clinical characteristics of the study groups**

| **Variable** | **Group 1 (NSAIDs/SS)** | **Group 2 (Anti-TNF-α)** | **Group 3 (Controls)** |
| --- | --- | --- | --- |
| **Gender, n (%)** | Female: 17 (56.7%) Male: 13 (43.3%) | Female: 13 (37.1%) Male: 22 (62.9%) | Female: 15 (50%) Male: 15 (50%) |
| **Age (years), Mean ± SD** | 38.03 ± 9.84 (18–57) | 40.20 ± 11.16 (20–59) | 31.00 ± 8.01 (20–49) |
| **AS duration (years), Mean ± SD** | 5.40 ± 5.44 | 8.16 ± 6.39 | — |

**Abbreviations:** SD = Standard deviation; AS = Ankylosing spondylitis; SS = Sulfasalazine.

**Table 2. Comparison of macular thickness, RNFL thickness and subfoveal choroidal thickness among the three groups**

| **ETDRS Areas (μm)** | **Group 1**  Mean±SD (μm) | **Group 2**  Mean±SD (μm) | **Group 3**  Mean±SD (μm) | **p-value** |
| --- | --- | --- | --- | --- |
| **Superior-inner** | 342.17 ± 19.55 | 341.34 ± 17.67 | 345.70 ± 23.49 | 0.396 |
| **Temporal-inner** | 331.30 ± 14.38 | 334.11 ± 21.63 | 336.50 ± 13.99 | 0.510 |
| **Inferior-inner** | 338.87 ± 17.85 | 336.74 ± 22.24 | 346.37 ± 14.30 | 0.105 |
| **Nasal-inner** | 340.63 ± 17.46 | 335.97 ± 17.38 | 349.87 ± 14.56 | 0.008 |
| **Superior-outer** | 309.17 ± 14.99 | 304.91 ± 14.40 | 310.57 ± 14.43 | 0.402 |
| **Temporal-outer** | 298.27 ± 18.63 | 304.40 ± 20.32 | 297.53 ± 12.97 | 0.230 |
| **Inferior-outer** | 297.60 ± 22.40 | 298.31 ± 21.44 | 300.97 ± 17.08 | 0.479 |
| **Nasal-outer** | 315.30 ± 23.20 | 305.63 ± 21.12 | 323.60 ± 18.73 | 0.003 |
| **Central macula** | 259.47 ± 23.60 | 258.43 ± 26.66 | 267.53 ± 19.91 | 0.356 |
| **RNFL (μm)** | 108.23 ± 12.13 | 111.40 ± 10.11 | 114.77 ± 10.14 | 0.069 |
| **Subfoveal choroid** | 353.23 ± 38.14 | 328.80 ± 53.23 | 322.63 ± 43.35 | 0.026 |

**Abbreviations:** RNFL = Retinal nerve fiber layer; SD = Standard deviation; ETDRS = Early Treatment Diabetic Retinopathy Study.

**Table 3. Comparison between Group 1 and Group 2**

| **ETDRS Areas (μm)** | **Group 1**  Mean±SD (μm) | **Group 2**  Mean±SD (μm) | **p-value** |
| --- | --- | --- | --- |
| **Superior-inner** | 342.17 ± 19.55 | 341.34 ± 17.67 | 0.985 |
| **Temporal-inner** | 331.30 ± 14.38 | 334.11 ± 21.63 | 0.791 |
| **Inferior-inner** | 338.87 ± 17.85 | 336.74 ± 22.24 | 0.718 |
| **Nasal-inner** | 340.63 ± 17.46 | 335.97 ± 17.38 | 0.469 |
| **Superior-outer** | 309.17 ± 14.99 | 304.91 ± 14.40 | 0.475 |
| **Temporal-outer** | 298.27 ± 18.63 | 304.40 ± 20.32 | 0.351 |
| **Inferior-outer** | 297.60 ± 22.40 | 298.31 ± 21.44 | 0.964 |
| **Nasal-outer** | 315.30 ± 23.20 | 305.63 ± 21.12 | 0.120 |
| **Central macula** | 259.47 ± 23.60 | 258.43 ± 26.66 | 0.678 |
| **RNFL (μm)** | 108.23 ± 12.13 | 111.40 ± 10.11 | 0.469 |
| **Subfoveal choroid** | 353.23 ± 38.14 | 328.80 ± 53.23 | 0.104 |

**Abbreviations:** RNFL = Retinal nerve fiber layer; SD = Standard deviation; ETDRS = Early Treatment Diabetic Retinopathy Study.

**Table 4. Comparison between Group 2 and Group 3**

| **ETDRS Areas (μm)** | **Group 2**  Mean±SD (μm) | **Group 3**  Mean±SD (μm) | **p-value** |
| --- | --- | --- | --- |
| **Superior-inner** | 341.34 ± 17.67 | 345.70 ± 23.49 | 0.523 |
| **Temporal-inner** | 334.11 ± 21.63 | 336.50 ± 13.99 | 0.841 |
| **Inferior-inner** | 336.74 ± 22.24 | 346.37 ± 14.30 | 0.077 |
| **Nasal-inner** | 335.97 ± 17.38 | 349.87 ± 14.56 | 0.002 |
| **Superior-outer** | 304.91 ± 14.40 | 310.57 ± 14.43 | 0.264 |
| **Temporal-outer** | 304.40 ± 20.32 | 297.53 ± 12.97 | 0.270 |
| **Inferior-outer** | 298.31 ± 21.44 | 300.97 ± 17.08 | 0.975 |
| **Nasal-outer** | 305.63 ± 21.12 | 323.60 ± 18.73 | 0.001 |
| **Central macula** | 258.43 ± 26.66 | 267.53 ± 19.91 | 0.331 |
| **RNFL (μm)** | 111.40 ± 10.11 | 114.77 ± 10.14 | 0.425 |
| **Subfoveal choroid** | 328.80 ± 53.23 | 322.63 ± 43.35 | 1.000 |

**Abbreviations:** RNFL = Retinal nerve fiber layer; SD = Standard deviation; ETDRS = Early Treatment Diabetic Retinopathy Study.

**Table 5. Comparison between Group 1 and Group 3**

| **ETDRS Areas (μm)** | **Group 1**  Mean±SD (μm) | **Group 3**  Mean±SD (μm) | **p-value** |
| --- | --- | --- | --- |
| **Superior-inner** | 342.17 ± 19.55 | 345.70 ± 23.49 | 0.647 |
| **Temporal-inner** | 331.30 ± 14.38 | 336.50 ± 13.99 | 0.474 |
| **Inferior-inner** | 338.87 ± 17.85 | 346.37 ± 14.30 | 0.362 |
| **Nasal-inner** | 340.63 ± 17.46 | 349.87 ± 14.56 | 0.031 |
| **Superior-outer** | 309.17 ± 14.99 | 310.57 ± 14.43 | 0.920 |
| **Temporal-outer** | 298.27 ± 18.63 | 297.53 ± 12.97 | 0.986 |
| **Inferior-outer** | 297.60 ± 22.40 | 300.97 ± 17.08 | 0.891 |
| **Nasal-outer** | 315.30 ± 23.20 | 323.60 ± 18.73 | 0.045 |
| **Central macula** | 259.47 ± 23.60 | 267.53 ± 19.91 | 0.079 |
| **RNFL (μm)** | 108.23 ± 12.13 | 114.77 ± 10.14 | 0.055 |
| **Subfoveal choroid** | 353.23 ± 38.14 | 322.63 ± 43.35 | 0.034 |

**Abbreviations:** RNFL = Retinal nerve fiber layer; SD = Standard deviation; ETDRS = Early Treatment Diabetic Retinopathy Study.
